# Supplementary material for: Anti-Diabetic Effects of Allulose in Diet-Induced Obese Mice via Regulation of mRNA Expression and Alteration of the Microbiome Composition
Source: PubMed Central journal article supplement (PMC7400868; doi:10.3390/nu12072113), 2020-07-16
Supplement: nutrients-12-02113-s001.pdf [file nutrients-12-02113-s001.pdf]

**Supplementary Table S1.** Composition of experimental diets (% of diet, w/w).

| Ingredients (g)            | ND     | HFD    | ALL    |
|----------------------------|--------|--------|--------|
| Casein                     | 200.00 | 200.00 | 200.00 |
| D,L-methionine             | 3.00   | 3.00   | 3.00   |
| Corn starch                | 150.00 | 111.00 | 111.00 |
| Sucrose                    | 500.00 | 370.00 | 320.00 |
| Cellulose powder           | 50.00  | 50.00  | 50.00  |
| Corn oil                   | 50.00  | 30.00  | 30.00  |
| Lard                       | -      | 170.00 | 170.00 |
| Mineral Mixture (AIN-76) * | 35.00  | 42.00  | 42.00  |
| Vitamin mix (AIN-76) †     | 10.00  | 12.00  | 12.00  |
| Choline bitartrate         | 2.00   | 2.00   | 2.00   |
| Cholesterol                | -      | 10.00  | 10.00  |
| tert-Butylhydroquinone     | 0.01   | 0.04   | 0.04   |
| D-allulose                 | -      | -      | 50.00  |
| Total (g)                  | 1000.0 | 1000.0 | 1000.0 |
| Calories (kcal/kg)         | 3902   | 4584   | 4384   |
| Calories (kcal/g)          | 3.902  | 4.584  | 4.384  |

ND, normal diet; HFD, high-fat diet; ALL, D-allulose, HFD supplemented with 5% D-allulose. \* Mineral mixture (AIN-76) calcium phosphate 500 g/kg, NaCl 74 g/kg, potassium citrate 2220 g/kg, potassium sulfate 52 g/kg, magnesium oxide 24 g/kg, manganous carbonate 3.5 g/kg, ferric citrate 6 g/kg, zinc carbonate 1.6 g/kg, cupric carbonate 0.3 g/kg, potassium iodate 0.01 g/kg, sodium selenite 0.01 g/kg, chromium potassium sulfate 0.55 g/kg, sucrose 118.03 g/kg. † Vitamin mixture AIN-76: thiamin HCl 0.6 g/kg, riboflavin 0.6 g/kg, pyridoxine HCl 0.7 g/kg, niacin 3 g/kg, calcium pantothenate 1.6 g/kg, folic acid 0.2 g/kg, biotin 0.02 g/kg, vitamin B<sub>12</sub> 1 g/kg, vitamin A (500 000 IU/g) 0.8 g/kg, vitamin D<sub>3</sub> (400 000 IU/g) 0.25 g/kg, vitamin E acetate (500 IU/g) 10 g/kg, menadione sodium bisulfite 0.08 g/kg, sucrose 981.15 g/kg.

**Supplementary Table S2.** Effects of 16-week D-allulose supplementation on plasma adipokine and cytokine concentrations in C57BL/6J mice fed a high-fat diet.

|                                            | ND     |    | HFD   |        | ERY |          | ALL    |    |                     |        |    |                    |
|--------------------------------------------|--------|----|-------|--------|-----|----------|--------|----|---------------------|--------|----|--------------------|
| Leptin (ng/ml)                             | 4.34   | ⊗⊗ | 2.39  | 19.58  | ⊗⊗  | 0.20**a  | 12.89  | ⊗⊗ | 0.30 <sup>a</sup>   | 12.24  | ⊗⊗ | 0.47 <sup>b</sup>  |
| Resistin (ng/ml)                           | 1.74   | ⊗⊗ | 6.20  | 2.23   | ⊗⊗  | 0.57**a  | 1.88   | ⊗⊗ | 0.39 <sup>ab</sup>  | 1.72   | ⊗⊗ | 1.29 <sup>b</sup>  |
| Adiponectin (ng/ml)                        | 5.27   | ⊗  | 11.48 | 4.75   | ⊗⊗  | 0.86**b  | 4.53   | ⊗⊗ | 0.36 <sup>b</sup>   | 5.23   | ⊗⊗ | 2.73 <sup>a</sup>  |
| Leptin: Adiponectin                        | 0.83   | ⊗⊗ | 3.93  | 4.11   | ⊗⊗  | 0.39**a  | 2.85   | ⊗⊗ | 0.43 <sup>ab</sup>  | 2.37   | ⊗⊗ | 0.86 <sup>b</sup>  |
| Interleukin 1-β (pg/ml)                    | 75.44  | ⊗⊗ | 10.35 | 186.03 | ⊗   | 23.19**a | 190.26 | ⊗  | 47.99 <sup>a</sup>  | 79.99  | ±  | 14.20 <sup>b</sup> |
| Interleukin 6 (pg/ml)                      | 2.55   | ⊗⊗ | 0.22  | 4.48   | ⊗   | 0.26**a  | 4.65   | ⊗  | 0.43 <sup>a</sup>   | 3.50   | ⊗  | 0.16 <sup>b</sup>  |
| Interleukin 10 (pg/ml)                     | 34.42  | ⊗⊗ | 6.68  | 38.49  | ⊗   | 4.40     | 36.35  | ⊗  | 8.42                | 39.72  | ⊗  | 6.49               |
| Interferon-γ (pg/ml)                       | 7.30   | ⊗⊗ | 0.75  | 12.08  | ⊗   | 1.88**a  | 11.76  | ⊗  | 1.94 <sup>a</sup>   | 7.87   | ⊗  | 1.15 <sup>b</sup>  |
| Monocyte chemoattractant protein 1 (pg/ml) | 503.03 | ⊗⊗ | 10.25 | 553.60 | ⊗   | 13.37**a | 533.57 | ⊗  | 12.89 <sup>ab</sup> | 450.51 | ⊗  | 9.39 <sup>b</sup>  |
| Tumor necrosis factor-α (ng/ml)            | 335.13 | ⊗⊗ | 0.05  | 426.60 | ⊗   | 0.14**a  | 401.00 | ⊗  | 0.06 <sup>a</sup>   | 329.52 | ⊗  | 0.06 <sup>b</sup>  |

Data are presented as the mean ± SE. Significant differences between HFD versus ND are indicated; \*\*p < 0.01. ab Means not sharing common letters in the same row are significantly different among the high-fat diet groups, at p < 0.05. ND, normal diet (AIN-76); HFD, high-fat diet (AIN-76, 20 % fat, 1% cholesterol); ERY (HFD + 5% Erythritol); ALL, (HFD + 5% D-allulose).

**Supplementary Table S3.** The numbers of up- or down-regulated genes in epididymal white adipose tissue D-allulose group compared to the high-fat diet group.

| Number of differentially expressed genes identified by mRNA-seq analysis |           |      |           |     |            |     |
|--------------------------------------------------------------------------|-----------|------|-----------|-----|------------|-----|
| Cut off                                                                  | HFD vs ND |      | ALL vs ND |     | ALL vs HFD |     |
|                                                                          | up        | 1285 | up        | 201 | up         | 178 |
|                                                                          | down      | 370  | down      | 292 | down       | 812 |
|                                                                          | total     | 1655 | total     | 493 | total      | 990 |

  

**FDR < 0.05 & fold change ≥ 2**

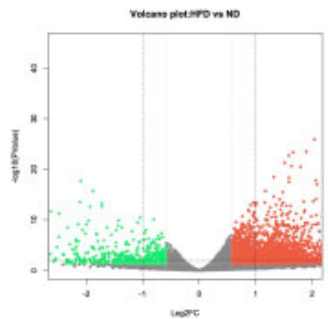



Differentially expressed genes based on HFD vs ND, ALL vs HFD comparison among to FDR <0.05, fold change ≥2. ND, normal diet (AIN-76); HFD, high fat diet (AIN-76, 20% fat, 1% cholesterol); ALL, (HFD+5% D-allulose).

**Supplementary Table S4.** The list of up- or down-regulated genes in hepatic tissue by allulose among the high-fat diet-responsive genes.

| <b>Numbers of differentially expressed genes identified by mRNA-seq analysis</b> |                                                                                                                                                                                                                                                                                                                                                                                                                                                                                                                                                                                                                                                                                                                                                                                                                                                                                                                                                                                                                                                                                                                                                                                                                                                                                                                                                                |
|----------------------------------------------------------------------------------|----------------------------------------------------------------------------------------------------------------------------------------------------------------------------------------------------------------------------------------------------------------------------------------------------------------------------------------------------------------------------------------------------------------------------------------------------------------------------------------------------------------------------------------------------------------------------------------------------------------------------------------------------------------------------------------------------------------------------------------------------------------------------------------------------------------------------------------------------------------------------------------------------------------------------------------------------------------------------------------------------------------------------------------------------------------------------------------------------------------------------------------------------------------------------------------------------------------------------------------------------------------------------------------------------------------------------------------------------------------|
| <b>Among the 1099 genes up-regulated by HFD</b>                                  |                                                                                                                                                                                                                                                                                                                                                                                                                                                                                                                                                                                                                                                                                                                                                                                                                                                                                                                                                                                                                                                                                                                                                                                                                                                                                                                                                                |
| <b>Up</b><br><b>1</b>                                                            | Obp2a                                                                                                                                                                                                                                                                                                                                                                                                                                                                                                                                                                                                                                                                                                                                                                                                                                                                                                                                                                                                                                                                                                                                                                                                                                                                                                                                                          |
| <b>Down</b><br><b>175</b>                                                        | Aatk, Abcc12, Acod1, Acyp2, Adgrg2, Adgrv1, Anxa2, Apol10b, Aqp7, Atp6v0d2, Atp8b5, B430306N03Rik, Batf3, BC023105, Cbr3, Ccl19ps3, Ccl7, Ccr2, Cd207, Cd274, Cd300lb, Cd52, Ces1g, Chil3, Chst11, Cidea, Ciita, Clec12a, Clec4e, Clec4n, Clec7a, Col12a1, Col3a1, Cotl1, Cpxm1, Csf2rb2, Cxcl10, Cxcl14, Cxcl9, Cyp2a22, Cyp2b13, Cyp2c55, Cyth4, Dcst2, Dfna5, Dgkg, Dhhrs9, Diaph3, Dock2, Ear2, Eda2r, Eif4e3, Ephb2, Esco2, Evi2a, Fabp3, Fabp4, Fam65b, Fam83a, Fam83f, Fbxo40, Fgl2, Fgr, Fosb, Gas7, Gbp10, Gbp2, Gbp5, Gbp6, Gins2, Gm10010, Gm12250, Gm13415, Gm15411, Gm16409, Gm37844, Gm44619, Gpr141, H2-DMa,H2-DMb1,H2M2, Haus8, Hk2, Hk3, Ifi209, Ifi211, Ifi2712b, Ifit2, Igtp, Il27, Insl6, Itga4, Itgb2, Ivl, Kbtbd11, Kif14, Klrk1, Krt8, Ldb3, Lgals1, Lgals3, Limk1, Lrrc14b, Lum, Ly6d, Ly75, Ly86, Ly9, Lyz2, Mas1, Matn2, Mfap3l, Mfi2, Mki67, Milk1, Mmp12, Mmp13, Mpeg1, Ms4a4c, Ms4a6c, Msrb3, Mthfd1l, Mybl1, Nipa1, Olfr56, Orm2, Orm3, Pcdh18, Plac8, Plek, Plin4, Psd4, Rassf4, S1pr2, Saa1, Saa2, Samsn1, Sdcbp2, Serpina7, Serpinb10, Serpinb9, Sirpb1a, Slamf8, Slc13a3, Slc13a4, Slc15a3, Slc1a4, Slc22a27, Slc28a1, Slc38a1, Slc39a4, Slc41a2, Smpd3, Smpdl3b, Sort1, St18, Tgtp1, Tgtp2, Tifa, Tnc, Tnfrsf19, Top2a, Tpm2, Trem1, Trp53cor1, Ttc39a, Ttc39aos1, Tubb6, Tyrobp, Uap1l1, Ubd, Vldlr, Vsig8, Zfp831, Zfp984 |
| <b>Among the 158 genes up-regulated by HFD</b>                                   |                                                                                                                                                                                                                                                                                                                                                                                                                                                                                                                                                                                                                                                                                                                                                                                                                                                                                                                                                                                                                                                                                                                                                                                                                                                                                                                                                                |
| <b>Up</b><br><b>15</b>                                                           | Cyp4a12b, Cyp4a14, E030018B13Rik, Eif4ebp3, Gm28438, Gm43314, Gm44117, Gm7463, Grm8, Hsd3b5, Lrp2, Moxd1, Mup21, RP23-306P12.3, Trpm5                                                                                                                                                                                                                                                                                                                                                                                                                                                                                                                                                                                                                                                                                                                                                                                                                                                                                                                                                                                                                                                                                                                                                                                                                          |
| <b>Down</b><br><b>4</b>                                                          | Idi1, Pcsk9, RP23-337J18.2, Ugt1a5                                                                                                                                                                                                                                                                                                                                                                                                                                                                                                                                                                                                                                                                                                                                                                                                                                                                                                                                                                                                                                                                                                                                                                                                                                                                                                                             |

Differentially expressed genes based on HFD vs ND, ALL vs HFD comparison among to FDR <0.05, fold change  $\geq 2$ . ND, normal diet (AIN-76); HFD, high fat diet (AIN-76, 20% fat, 1% cholesterol); ERY (HFD+5% Erythritol); ALL, (HFD+5% D-allulose).

| A Genus level |                         | Turcibacter    | Coprococcus         |
|---------------|-------------------------|----------------|---------------------|
| FBG           | Spearman Correlation    | 0.359*         | -0.160              |
|               | Significance (2-tailed) | 0.049          | 0.366               |
|               | N                       | 34             | 34                  |
| Family level  |                         | Clostridiaceae | Erysipelotrichaceae |
| FBG           | Spearman Correlation    | .360*          | -0.107              |
|               | Significance (2-tailed) | 0.036          | 0.024               |
|               | N                       | 34             | 34                  |

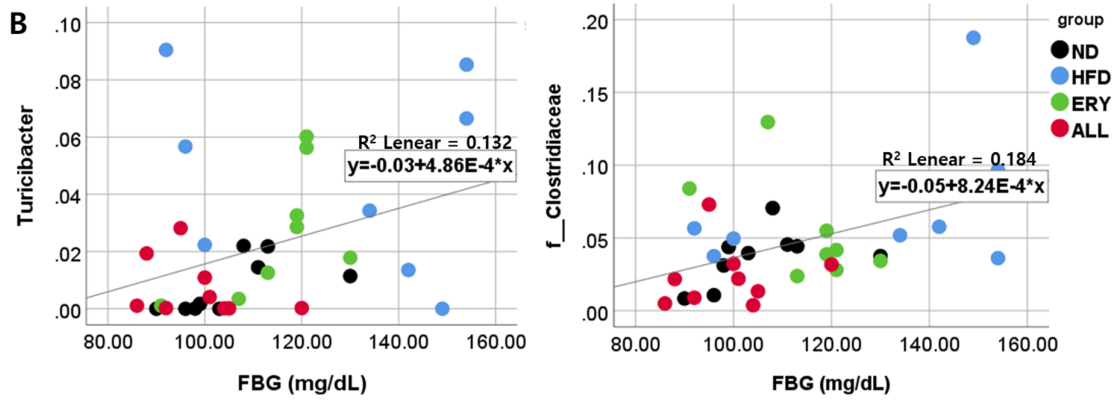

Supplementary Figure S1. The correlation between Turcibacter, Clostridiaceae and fasting blood glucose.
